# Supplementary material
Source: Springer Nature journal article supplement (https://www.springermedizin.de/resource/supplementary/12885_2014_4530_MOESM1_ESM.pdf/9466642)
Supplement: MOESM1 [file 9466642]

day 1: (first)  
treatment

day 2

day 3

day 4

placebo

placebo

placebo

placebo

8 mg  
dexamethasone

placebo

placebo

placebo

8 mg  
dexamethasone

8 mg  
dexamethasone

8 mg  
dexamethasone

8 mg  
dexamethasone

R  
A  
N  
D  
O  
M  
I  
Z  
A  
T  
I  
O  
N
